# Supplementary material for: ANXA2 promotes esophageal cancer progression by activating MYC-HIF1A-VEGF axis
Source: PubMed Central journal article supplement (PMC6091180; doi:10.1186/s13046-018-0851-y), 2018-08-06

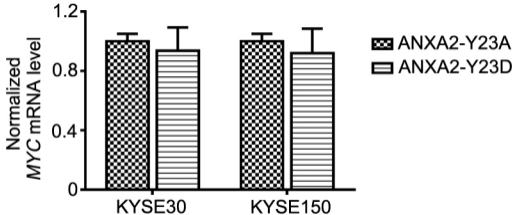

Supplement: 13046_2018_851_MOESM7_ESM.pdf [file 13046_2018_851_MOESM7_ESM.pdf]
