# Supplementary material for: ANXA2 promotes esophageal cancer progression by activating MYC-HIF1A-VEGF axis
Source: Springer Nature journal article supplement (doi:10.1186/s13046-018-0851-y), 2018-08-06

# shANXA2

pcDNA3.1

ANXA2-S25A

ANXA2-S25D

KYSE30

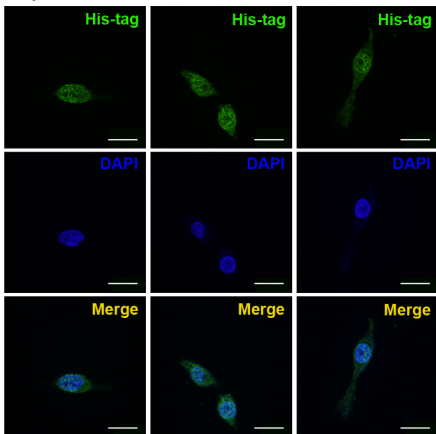

KYSE150

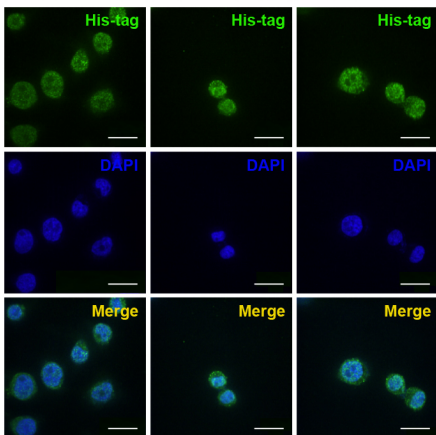

Supplement: MOESM6 [file 16012952]
